# Supplementary material
Source: PubMed Central journal article supplement (PMC1736104)
Supplement: jmedgene_42_7_551__1.pdf [file jmedgene_42_7_551__1.pdf]

***LPIN2* primer sequence, amplification size and annealing temperature**

| Primer   | Primer sequence                 | Size (bp) | Temp |
|----------|---------------------------------|-----------|------|
| LIP1F    | 5'TGGCCCATACTGGTTTATGTT3'       | 377       | 60°  |
| LIP1R    | 5'ATCGGAGATCGCGCAACTA3'         |           |      |
| LIP2F    | 5'TGAAATCTGGCATAACAAGTGAG3'     | 374       | 60°  |
| LIP2R    | 5'GGACACTCACTCACTTTCTCTTTG3'    |           |      |
| LIP3F    | 5'TGAAGGAAAGACTCCTTGAACA3'      | 198       | 60°  |
| LIP3R    | 5'TACCAGAGGCCTGAGCACAC3'        |           |      |
| LIP4F    | 5'CACTGTCGAGTTTGTCATGGA3'       | 399       | 60°  |
| LIP4/SF* | 5'GAAATCGGGTGGAGATGAAA3         | 192       | 60°  |
| LIP4R    | 5'TGAACTCTAGGTACCCGCACA3'       |           |      |
| LIP5F    | 5'ATGTCATCGTTCCTGCCTTT3'        | 201       | 60°  |
| LIP5R    | 5'TTAATACATCTCCTTCCTCTTTCAA3'   |           |      |
| LIP6F    | 5'AGAACTCAAGTGGAAGAAATAATTG3'   | 414       | 56°  |
| LIP6R    | 5'CATGAGGGCACTATCATTTACA3'      |           |      |
| LIP7F    | 5'CACATTGCCAGCTTAGGAAA3'        | 470       | 58°  |
| LIP7R    | 5'CCATCTAATTTGAGAGTACCTGGA3'    |           |      |
| LIP8F    | 5'GCAGAGCTGTAAATGAAGAATAACT3    | 250       | 58°  |
| LIP8R    | 5'CATCTTGTTCCTTTTTCCTGAG3'      |           |      |
| LIP9F    | 5'CCCAGAGAACCATGCAGTAAA3'       | 382       | 60°  |
| LIP9R    | 5'CCTGCACAAGATCCCTAAAGAA3'      |           |      |
| LIP10F   | 5'AGCCTTCAATTTCTGCAATG3'        | 292       | 58°  |
| LIP10R   | 5'ATGACAAGTTTTATAAGAAGGAACACT3' |           |      |

| Primer  | Primer sequence                | Size (bp) | Temp |
|---------|--------------------------------|-----------|------|
| LIP11F  | 5'CCCCTCTCTCTTGCTCACTTT3'      | 244       | 58°  |
| LIP11R  | 5'GCTCAAGTAAACTTTGAATAGTACCC3' |           |      |
| LIP12F  | 5'GTAGGTGCTGTGTGGCCAGT3'       | 231       | 62°  |
| LIP12R  | 5'CCTGTGCCTGACAAAAAGGT3'       |           |      |
| LIP13F  | 5'CCTAGAGAGGGCTGCTGATG3'       | 210       | 60°  |
| LIP13R  | 5'GCTAGAGGGCCTGAGTGCTA3'       |           |      |
| LIP14F  | 5'CCTGCTGCCTCTTCCGTA3'         | 249       | 58°  |
| LIP14R  | 5'TGTGCATCAAATTAACCATTACT3'    |           |      |
| LIP15F  | 5'AACCATCCTGCCTCTTGTTG3'       | 343       | 58°  |
| LIP15R  | 5'GAGGAACTCCCCACCACAC3'        |           |      |
| LIP16F  | 5'GTCCCGCCACCAATTAGTTA3'       | 242       | 58°  |
| LIP16R  | 5'AAAGCAAGCTTCCAGCTCAC3'       |           |      |
| LIP17F  | 5'TCTTTTCCCTTAGCCAGAACA3'      | 297       | 59°  |
| LIP17R  | 5'TCTGACTTCTGTTCCACACA3'       |           |      |
| LIP18F  | 5'GGGAAAACGACCATTTGAG3'        | 249       | 60°  |
| LIP18R  | 5'GAATTGGGACGTGGCTACAC3'       |           |      |
| LIP19F  | 5'CTGAATTCTCCTCCCTGGAA3'       | 218       | 60°  |
| LIP19R  | 5'GGTCTGTCTGTCCCCAACTG3'       |           |      |
| LIP20AF | 5'CTTGTGCCTTTGACCGATCT3'       | 556       | 60°  |
| LIP20AR | 5'TGTGCAGTGTTTTGGTCCAC3'       |           |      |
| LIP20BF | 5'GCACACATGTTTCCTGCTGT3'       | 580       | 62°  |
| LIP20BR | 5'CTCAACCGCCTATCTGCATT3'       |           |      |

| Primer  | Primer sequence            | Size (bp) | Temp |
|---------|----------------------------|-----------|------|
| LIP20CF | 5'GACAACTCCACGAGCCCTTA3'   | 596       | 62°  |
| LIP20CR | 5'AGCTCTGGAGCAGCTTATGG3'   |           |      |
| LIP20DF | 5'TGGTAGCTCCATTTACTGATGC3' | 494       | 62°  |
| LIP20DR | 5'TGAGCCTTCCTAGGTTTTGC3'   |           |      |
| LIP20EF | 5'TGGAGAGTTGAAAGTCCCTGA3'  | 598       |      |
| LIP20ER | 5'AGCAGACACAGGGACAGAGG3'   |           |      |
| LIP20FF | 5'TGGACACATGGGCCTTCTTA3'   | 577       | 60°  |
| LIP20FR | 5'CTGCATGCTCCAGGTCTACA3'   |           |      |

\* LIP4/SF together with LIP4R were used for the SSCP experiments for the c.540-541delAT screening in the control population
